# Supplementary material for: Determination of Potentially Novel Compensatory Mutations in rpoC Associated with Rifampin Resistance and rpoB Mutations in Mycobacterium tuberculosis Clinical Isolates from Peru
Source: PubMed Central journal article supplement — Int J Mycobacteriol. Author manuscript; Available in PMC 2023 Mar 17. (PMC10022416; doi:10.4103/ijmy.ijmy_27_20), 2020
Supplement: NIHMS1877347-supplement-1.pdf [file NIHMS1877347-supplement-1.pdf]

**Supplementary Table 1: rpoC mutations in rifampicin-sensitive strains without mutations in rpoB (Set A)**

| Strain number    | Spoligotyping      | Original base | Mutated base | Reference codon | Codon position | Mutations codon | aa change |
|------------------|--------------------|---------------|--------------|-----------------|----------------|-----------------|-----------|
| 14722_6#15_H37Rv | Haarlem            | G             | A            | ggg             | 2              | gAg             | G594E     |
| 14722_6#30_H37Rv | Other small clades | G             | A            | ggg             | 2              | gAg             | G594E     |
| 14722_6#31_H37Rv | Other small clades | G             | A            | ggg             | 2              | gAg             | G594E     |
| 14722_6#39_H37Rv | Other small clades | g             | A            | ggg             | 2              | gAg             | G594E     |
| 14722_6#42_H37Rv | Haarlem            | G             | A            | ggg             | 2              | gAg             | G594E     |
| 14722_6#58_H37Rv | Other small clades | G             | A            | ggg             | 2              | gAg             | G594E     |
| 14722_6#71_H37Rv | Other small clades | G             | A            | ggg             | 2              | gAg             | G594E     |
| 14722_6#79_H37Rv | Haarlem            | G             | A            | ggg             | 2              | gAg             | G594E     |
| 14722_7#29_H37Rv | Haarlem            | G             | A            | ggg             | 2              | gAg             | G594E     |
| 14722_7#31_H37Rv | Haarlem            | G             | A            | ggg             | 2              | gAg             | G594E     |
| 14722_7#35_H37Rv | Haarlem            | G             | A            | ggg             | 2              | gAg             | G594E     |
| 14722_7#47_H37Rv | Haarlem            | G             | A            | ggg             | 2              | gAg             | G594E     |
| 14722_7#49_H37Rv | Other small clades | G             | A            | ggg             | 2              | gAg             | G594E     |
| 14722_7#51_H37Rv | Haarlem            | G             | A            | ggg             | 2              | gAg             | G594E     |
| 14722_7#61_H37Rv | Other small clades | G             | A            | ggg             | 2              | gAg             | G594E     |
| 14722_7#70_H37Rv | Other small clades | G             | A            | ggg             | 2              | gAg             | G594E     |
| 14722_7#73_H37Rv | Haarlem            | G             | A            | ggg             | 2              | gAg             | G594E     |
| 14722_7#85_H37Rv | Other small clades | G             | A            | ggg             | 2              | gAg             | G594E     |
| 14722_7#88_H37Rv | Haarlem            | G             | A            | ggg             | 2              | gAg             | G594E     |
| 14722_7#93_H37Rv | Haarlem            | G             | A            | ggg             | 2              | gAg             | G594E     |
| 14892_2#10_H37Rv | Haarlem            | G             | A            | ggg             | 2              | gAg             | G594E     |
| 14892_2#18_H37Rv | Haarlem            | G             | A            | ggg             | 2              | gAg             | G594E     |
| 14892_2#25_H37Rv | LAM                | G             | A            | cgc             | 2              | cAc             | R1163H    |
| 14892_2#30_H37Rv | Haarlem            | G             | A            | ggg             | 2              | gAg             | G594E     |
| 14892_2#44_H37Rv | Other small clades | G             | A            | ggg             | 2              | gAg             | G594E     |
| 14892_2#46_H37Rv | Other small clades | G             | A            | ggg             | 2              | gAg             | G594E     |
| 14892_2#54_H37Rv | Haarlem            | G             | A            | ggg             | 2              | gAg             | G594E     |
| 14892_2#57_H37Rv | Haarlem            | G             | A            | ggg             | 2              | gAg             | G594E     |
| 14892_2#61_H37Rv | Other small clades | G             | A            | ggg             | 2              | gAg             | G594E     |
| 14892_2#7_H37Rv  | Haarlem            | G             | A            | ggg             | 2              | gAg             | G594E     |
| 14893_2#11_H37Rv | Haarlem            | G             | A            | ggg             | 2              | gAg             | G594E     |
| 14893_2#20_H37Rv | Other small clades | G             | A            | ggg             | 2              | gAg             | G594E     |
| 14893_2#3_H37Rv  | Haarlem            | G             | A            | ggg             | 2              | gAg             | G594E     |
| 14893_2#33_H37Rv | T                  | G             | A            | ggg             | 2              | gAg             | G594E     |
| 14893_2#41_H37Rv | Haarlem            | G             | A            | ggg             | 2              | gAg             | G594E     |
| 14893_2#42_H37Rv | Haarlem            | G             | A            | ggg             | 2              | gAg             | G594E     |
| 14893_2#5_H37Rv  | EAI2-manilla       | C             | T            | gcc             | 2              | gTc             | A172V     |
| 14893_2#51_H37Rv | Other small clades | G             | A            | ggg             | 2              | gAg             | G594E     |
| 14893_2#57_H37Rv | Haarlem            | G             | A            | ggg             | 2              | gAg             | G594E     |
| 14893_2#60_H37Rv | Haarlem            | G             | A            | ggg             | 2              | gAg             | G594E     |
| 14893_2#67_H37Rv | Haarlem            | G             | A            | ggg             | 2              | gAg             | G594E     |
| 14892_2#15_H37Rv | Other small clades | G             | A            | ggg             | 2              | gAg             | G594E     |

**Supplementary Table 2: rpoC mutations in rifampicin-resistant strains that harbored rpoB mutations (Set B)**

| Strain Number    | Spoligotyping      | Mutations in rpoC |              |                 |                |                 |           | Mutations in rpoB |              |                 |                |                 |           |
|------------------|--------------------|-------------------|--------------|-----------------|----------------|-----------------|-----------|-------------------|--------------|-----------------|----------------|-----------------|-----------|
|                  |                    | Original base     | Mutated base | Reference codon | Codon position | Mutations codon | aa change | Original base     | Mutated base | Reference codon | Codon position | Mutations codon | aa change |
| 14722_6#1_H37Rv  | T                  | T                 | C            | gtg             | 2              | gCg             | V483A     | C                 | T            | teg             | 2              | tTg             | S450L     |
| 14722_6#12_H37Rv | Beijing            | C                 | G            | cgg             | 2              | cGg             | P1040R    | C                 | T            | teg             | 2              | tTg             | S450L     |
| 14722_6#13_H37Rv | LAM                | C                 | G            | cgg             | 1              | Gcg             | P1040A    | C                 | T            | teg             | 2              | tTg             | S450L     |
| 14722_6#16_H37Rv | LAM                | A                 | G            | atc             | 1              | Gtc             | I491V     | C                 | T            | teg             | 2              | tTg             | S450L     |
| 14722_6#2_H37Rv  | LAM                | A                 | G            | atc             | 1              | Gtc             | I491V     | G                 | A            | gcc             | 1              | Acc             | A692T     |
| 14722_6#28_H37Rv | LAM                | C                 | G            | cgg             | 1              | Gcg             | P1040A    | C                 | T            | teg             | 2              | tTg             | S450L     |
| 14722_6#29_H37Rv | Beijing            | G                 | C            | tgg             | 2              | tCg             | W484S     | C                 | T            | teg             | 2              | tTg             | S450L     |
| 14722_6#3_H37Rv  | Other small clades | G                 | A            | ggg             | 2              | gAg             | G594E     | C                 | T            | teg             | 2              | tTg             | S450L     |
| 14722_6#33_H37Rv | LAM                | C                 | A            | cgc             | 1              | Agc             | R741S     | C,A               | T,G          | cac             | 1,2            | TGT             | H445C     |
| 14722_6#34_H37Rv | Haarlem            | G                 | A            | ggg             | 2              | gAg             | G594E     | C                 | T            | teg             | 2              | tTg             | S450L     |
| 14722_6#38_H37Rv | LAM                | C                 | G            | cgg             | 1              | Gcg             | P1040A    | C                 | T            | teg             | 2              | tTg             | S450L     |
| 14722_6#43_H37Rv | Other small clades | G                 | A            | ggg             | 2              | gAg             | G594E     | C                 | T            | teg             | 2              | tTg             | S450L     |
| 14722_6#45_H37Rv | LAM                | G                 | T            | gtg             | 1              | Ttg             | V517L     | C                 | T            | teg             | 2              | tTg             | S450L     |
| 14722_6#51_H37Rv | LAM                | G                 | T            | gtg             | 1              | Ttg             | V517L     | C                 | T            | teg             | 2              | tTg             | S450L     |
| 14722_6#55_H37Rv | Other small clades | G                 | A            | ggg             | 2              | gAg             | G594E     | C                 | T            | teg             | 2              | tTg             | S450L     |
| 14722_6#56_H37Rv | Other small clades | G                 | A            | ggg             | 2              | gAg             | G594E     | A                 | T            | gac             | 2              | gTc             | D435V     |
| 14722_6#57_H37Rv | LAM                | C                 | G            | cgg             | 1              | Gcg             | P1040A    | C                 | T            | teg             | 2              | tTg             | S450L     |
| 14722_6#59_H37Rv | T                  | T                 | G            | tfg             | 1              | Gtg             | L527V     | C                 | T            | teg             | 2              | tTg             | S450L     |
| 14722_6#63_H37Rv | Haarlem            | G                 | A            | ggg             | 2              | gAg             | G594E     | C                 | T            | gtg             | 1              | Ctg             | V695L     |
| 14722_6#67_H37Rv | LAM                | C                 | T            | acc             | 2              | aTc             | T812I     | C                 | T            | teg             | 2              | tTg             | S450L     |
| 14722_6#72_H37Rv | Haarlem            | G                 | A            | ggg             | 2              | gAg             | G594E     | G                 | A            | gcc             | 1              | Acc             | A692T     |
| 14722_6#73_H37Rv | Haarlem            | G                 | A            | ggg             | 2              | gAg             | G594E     | A                 | T            | gac             | 2              | gTc             | D435V     |
| 14722_6#86_H37Rv | LAM                | C                 | G            | cgg             | 1              | Gcg             | P1040A    | C                 | T            | teg             | 2              | tTg             | S450L     |
| 14722_6#87_H37Rv | LAM                | A                 | G            | atc             | 1              | Gtc             | I491V     | C                 | T            | teg             | 2              | tTg             | S450L     |
| 14722_6#88_H37Rv | LAM                | A                 | G            | atc             | 1              | Gtc             | I491V     | G                 | A            | gcc             | 1              | Acc             | A692T     |
| 14722_6#89_H37Rv | Haarlem            | G                 | A            | ggg             | 2              | gAg             | G594E     | C                 | T            | teg             | 2              | tTg             | S450L     |
|                  |                    |                   |              |                 |                |                 |           | G                 | A            | gcc             | 1              | Acc             | A692T     |
|                  |                    |                   |              |                 |                |                 |           | A                 | T            | gac             | 2              | gTc             | D435V     |

Contd...

**Supplementary Table 2: Contd...**

| Strain Number    | Spoligotyping      | Mutations in rpoC |              |                 |                |                 |           | Mutations in rpoB |              |                 |                |                 |           |
|------------------|--------------------|-------------------|--------------|-----------------|----------------|-----------------|-----------|-------------------|--------------|-----------------|----------------|-----------------|-----------|
|                  |                    | Original base     | Mutated base | Reference codon | Codon position | Mutations codon | aa change | Original base     | Mutated base | Reference codon | Codon position | Mutations codon | aa change |
| 14722_6#9_H37Rv  | Other small clades | G                 | A            | ggg             | 3              | gAg             | G594E     | C                 | T            | teg             | 2              | tTg             | S450L     |
| 14722_6#91_H37Rv | Other small clades | T                 | G            | ttg             | 1              | Gtg             | L527V     |                   |              |                 |                |                 |           |
| 14722_6#94_H37Rv | Haarlem            | G                 | A            | ggg             | 2              | gAg             | G594E     | C                 | T            | teg             | 2              | tTg             | S450L     |
| 14722_7#10_H37Rv | Haarlem            | G                 | A            | ggg             | 2              | gAg             | G594E     | C                 | T            | teg             | 2              | tTg             | S450F     |
| 14722_7#12_H37Rv | Beijing            | C                 | G            | cac             | 3              | caG             | H525Q     | C                 | T            | teg             | 2              | tTg             | S450L     |
| 14722_7#22_H37Rv | LAM                | C                 | A            | cgc             | 1              | Agc             | R741S     | C                 | T            | teg             | 2              | tTg             | S450L     |
| 14722_7#17_H37Rv | Beijing            | G                 | C            | igg             | 2              | tCg             | W484S     | C                 | A            | gac             | 3              | gaA             | D574E     |
| 14722_7#19_H37Rv | LAM                | T                 | C            | gtg             | 2              | gCg             | V483A     | C                 | T            | teg             | 2              | tTg             | S450L     |
| 14722_7#20_H37Rv | T                  | T                 | G            | ttg             | 1              | Gtg             | L527V     | C                 | T            | teg             | 2              | tTg             | S450L     |
| 14722_7#21_H37Rv | T                  | G                 | C            | ggc             | 1              | Cgc             | G332R     | C                 | T            | teg             | 2              | tTg             | S450L     |
| 14722_7#22_H37Rv | Other small clades | G                 | A            | ggg             | 2              | gAg             | G594E     | G                 | C            | gtg             | 1              | Ctg             | V695L     |
| 14722_7#23_H37Rv | Haarlem            | G                 | A            | ggg             | 2              | gAg             | G594E     | A                 | T            | gac             | 2              | gTc             | D435V     |
| 14722_7#24_H37Rv | Haarlem            | A                 | G            | gaa             | 2              | gCia            | E488G     | C                 | T            | teg             | 2              | tTg             | S450L     |
| 14722_7#26_H37Rv | LAM                | C                 | G            | cgg             | 2              | cGg             | P1040R    | C                 | T            | teg             | 2              | tTg             | S450L     |
| 14722_7#30_H37Rv | Other small clades | A                 | G            | gag             | 2              | gGg             | E744G     | C                 | T            | teg             | 2              | tTg             | S450L     |
| 14722_7#34_H37Rv | Other small clades | G                 | A            | ggg             | 2              | gAg             | G594E     |                   |              |                 |                |                 |           |
| 14722_7#37_H37Rv | Haarlem            | G                 | T            | gtg             | 1              | Ttg             | V517L     | C                 | T            | teg             | 2              | tTg             | S450L     |
| 14722_7#42_H37Rv | Haarlem            | C                 | A            | cgg             | 2              | cAg             | P1040Q    | C                 | T            | teg             | 2              | tTg             | S450L     |
| 14722_7#44_H37Rv | T                  | G                 | T            | gtg             | 1              | Ttg             | V1252L    | G                 | C            | gtg             | 1              | Ctg             | V695L     |
| 14722_7#50_H37Rv | LAM                | G                 | T            | gtg             | 1              | Ttg             | V517L     | C                 | T            | cgg             | 1              | Tcg             | P45S      |
| 14722_7#53_H37Rv | Other small clades | T                 | C            | gtg             | 2              | gCg             | V1147A    | C                 | T            | teg             | 2              | tTg             | S450L     |
| 14722_7#58_H37Rv | Other small clades | G                 | A            | ggg             | 2              | gAg             | G594E     | C                 | T            | teg             | 2              | tTg             | S450L     |
| 14722_7#59_H37Rv | Other small clades | G                 | A            | ggg             | 2              | gAg             | G594E     | C                 | T            | teg             | 2              | tTg             | S450L     |

Contd...

**Supplementary Table 2: Contd...**

| Strain Number    | Spoligotyping      | Mutations in rpoC |              |                 |                |                 |           | Mutations in rpoB |              |                 |                |                 |           |
|------------------|--------------------|-------------------|--------------|-----------------|----------------|-----------------|-----------|-------------------|--------------|-----------------|----------------|-----------------|-----------|
|                  |                    | Original base     | Mutated base | Reference codon | Codon position | Mutations codon | aa change | Original base     | Mutated base | Reference codon | Codon position | Mutations codon | aa change |
| 14722_7#62_H37Rv | Beijing            | C                 | G            | cag             | 1              | Gag             | Q523E     | C                 | T            | teg             | 2              | tTg             | S450L     |
| 14722_7#63_H37Rv | LAM                | T                 | A            | ctg             | 2              | cAg             | L516Q     | C                 | T            | teg             | 2              | tTg             | S450L     |
| 14722_7#65_H37Rv | LAM                | C                 | T            | acc             | 2              | aTc             | T812I     | C                 | T            | teg             | 2              | tTg             | S450L     |
| 14722_7#66_H37Rv | Other small clades | G                 | A            | ggg             | 2              | gAg             | G594E     | G                 | A            | gcc             | 1              | Acc             | A692T     |
| 14722_7#7_H37Rv  | Other small clades | G                 | A            | ggg             | 1              | Agg             | G571R     | G                 | T            | gtc             | 1              | Ttc             | V170F     |
| 14722_7#74_H37Rv | Haarlem            | G                 | A            | ggg             | 2              | gAg             | G594E     | A                 | G            | gag             | 2              | gGg             | E250G     |
| 14722_7#76_H37Rv | Other small clades | T                 | C            | ttc             | 1              | Ctc             | F831L     | C                 | T            | teg             | 2              | tTg             | S450L     |
| 14722_7#78_H37Rv | Beijing            | G                 | A            | ggg             | 2              | gAg             | G594E     | C                 | T            | teg             | 2              | tTg             | S450L     |
| 14722_7#81_H37Rv | Haarlem            | G                 | A            | ggg             | 2              | gAg             | G594E     | C                 | T            | cac             | 1              | Tac             | H445Y     |
| 14722_7#82_H37Rv | T                  | G                 | C            | ggc             | 1              | Cgc             | G332R     | C                 | T            | teg             | 2              | tTg             | S450L     |
| 14722_7#83_H37Rv | Haarlem            | G                 | A            | ggg             | 2              | gAg             | G594E     | C                 | T            | gtg             | 1              | Ctg             | V695L     |
| 14722_7#87_H37Rv | T                  | G                 | C            | ggc             | 1              | Cgc             | G332R     | C                 | T            | teg             | 2              | tTg             | S450L     |
| 14722_7#90_H37Rv | Other small clades | G                 | A            | ggg             | 2              | gAg             | G594E     | C                 | T            | atg             | 1              | Gtg             | M920V     |
| 14722_7#95_H37Rv | Other small clades | T                 | G            | gtg             | 2              | gGg             | V483G     | C                 | T            | teg             | 2              | tTg             | S450L     |
| 14722_7#95_H37Rv | Other small clades | G                 | A            | ggg             | 2              | gAg             | G594E     | C                 | T            | teg             | 2              | tTg             | S450L     |
| 14722_8#11_H37Rv | LAM                | C                 | A            | aac             | 3              | aaA             | N698K     | C                 | T            | teg             | 2              | tTg             | S450L     |
| 14722_8#14_H37Rv | LAM                | A                 | G            | atc             | 1              | Gtc             | I885V     | C                 | T            | teg             | 2              | tTg             | S450L     |
| 14722_8#15_H37Rv | LAM                | G                 | C            | ggc             | 1              | Ccc             | A1047P    | C                 | T            | teg             | 2              | tTg             | S450L     |
| 14722_8#16_H37Rv | Haarlem            | T                 | C            | ctg             | 2              | cCg             | L516P     | C                 | T            | teg             | 2              | tTg             | S450L     |
| 14722_8#17_H37Rv | Haarlem            | G                 | A            | ggg             | 2              | gAg             | G594E     | C                 | T            | teg             | 2              | tTg             | S450L     |
| 14722_8#18_H37Rv | LAM                | G                 | A            | gtg             | 1              | Aig             | V1252M    | C                 | T            | teg             | 2              | tTg             | S450L     |
| 14722_8#19_H37Rv | Haarlem            | G                 | A            | ggg             | 2              | gAg             | G594E     | A                 | G            | gac             | 2              | gGc             | D120G     |
| 14722_8#2_H37Rv  | LAM                | C                 | A            | cgc             | 1              | Agc             | R741S     | C                 | T            | cac             | 1              | Tac             | H445Y     |
| 14722_8#2_H37Rv  | LAM                | C                 | A            | cgc             | 1              | Agc             | R741S     | C                 | G            | cac             | 1              | Gac             | H445D     |

Contd...

**Supplementary Table 2: Contd...**

| Strain Number    | Spoligotyping      | Mutations in rpoC |              |                 |                |                 |           | Mutations in rpoB |              |                 |                |                 |           |
|------------------|--------------------|-------------------|--------------|-----------------|----------------|-----------------|-----------|-------------------|--------------|-----------------|----------------|-----------------|-----------|
|                  |                    | Original base     | Mutated base | Reference codon | Codon position | Mutations codon | aa change | Original base     | Mutated base | Reference codon | Codon position | Mutations codon | aa change |
| 14722_8#20_H37Rv | LAM                | C                 | T            | cgg             | 2              | cTg             | P1040L    | C                 | T            | teg             | 2              | tTg             | S450L     |
| 14722_8#21_H37Rv | LAM                | T                 | G            | gtg             | 2              | gGg             | V483G     | C                 | T            | teg             | 2              | tTg             | S450L     |
| 14722_8#22_H37Rv | LAM                | C                 | A            | aac             | 3              | aaa             | N698K     | C                 | T            | teg             | 2              | tTg             | S450L     |
| 14722_8#23_H37Rv | LAM                | C                 | G            | cgg             | 1              | Gcg             | P1040A    | C                 | T            | teg             | 2              | tTg             | S450L     |
| 14722_8#24_H37Rv | LAM                | A                 | G            | aac             | 2              | aGc             | N698S     | C                 | T            | teg             | 2              | tTg             | S450L     |
| 14722_8#27_H37Rv | LAM                | C                 | G            | cgg             | 1              | Gcg             | P1040A    | C                 | T            | teg             | 2              | tTg             | S450L     |
| 14722_8#3_H37Rv  | LAM                | G                 | T            | ggc             | 2              | gTc             | G945V     | C                 | T            | teg             | 2              | tTg             | S450L     |
| 14722_8#31_H37Rv | LAM                | A                 | G            | aac             | 2              | aGc             | N698S     | C                 | T            | teg             | 2              | tTg             | S450L     |
| 14722_8#32_H37Rv | LAM                | C                 | T            | acc             | 2              | aTc             | T812I     | C                 | T            | teg             | 2              | tTg             | S450L     |
| 14722_8#36_H37Rv | Haarlem            | G                 | A            | ggg             | 2              | gAg             | G594E     | G                 | A            | gcc             | 1              | Acc             | A692T     |
| 14722_8#37_H37Rv | Haarlem            | G                 | A            | ggg             | 2              | gAg             | G594E     | A                 | T            | cac             | 2              | cTc             | H445L     |
| 14722_8#38_H37Rv | Haarlem            | G                 | A            | ggg             | 1              | Agg             | G571R     | C                 | T            | teg             | 2              | tTg             | S450L     |
| 14722_8#38_H37Rv | Haarlem            | C                 | T            | gcc             | 2              | gTc             | A734V     | C                 | T            | teg             | 2              | tTg             | S450L     |
| 14722_8#39_H37Rv | Haarlem            | G                 | A            | ggg             | 2              | gAg             | G594E     | C                 | T            | teg             | 2              | tTg             | S450L     |
| 14722_8#4_H37Rv  | LAM                | C                 | G            | cgg             | 1              | Gcg             | P1040A    | C                 | T            | teg             | 2              | tTg             | S450L     |
| 14722_8#4_H37Rv  | LAM                | C                 | T            | acc             | 2              | aTc             | T812I     | C                 | T            | teg             | 2              | tTg             | S450L     |
| 14722_8#41_H37Rv | LAM                | G                 | T            | gtg             | 1              | Ttg             | V517L     | G                 | A            | gcc             | 1              | Acc             | A692T     |
| 14722_8#44_H37Rv | Haarlem            | G                 | A            | ggg             | 2              | gAg             | G594E     | C                 | T            | teg             | 2              | tTg             | S450L     |
| 14722_8#45_H37Rv | Other small clades | G                 | A            | ggg             | 2              | gAg             | G594E     | C                 | G            | cac             | 1              | Gac             | H445D     |
| 14722_8#50_H37Rv | LAM                | G                 | A            | gtg             | 1              | Aig             | V1252M    | C                 | T            | teg             | 2              | tTg             | S450L     |
| 14722_8#53_H37Rv | LAM                | G                 | T            | gtg             | 1              | Ttg             | V517L     | C                 | T            | teg             | 2              | tTg             | S450L     |
| 14722_8#55_H37Rv | Beijing            | G                 | C            | tgg             | 2              | tCg             | W484S     | C                 | T            | teg             | 2              | tTg             | S450L     |
| 14722_8#56_H37Rv | LAM                | A                 | G            | atc             | 1              | Gtc             | I491V     | C                 | T            | teg             | 2              | tTg             | S450L     |
| 14722_8#57_H37Rv | LAM                | T                 | G            | gtg             | 2              | gGg             | V483G     | G                 | A            | gcc             | 1              | Acc             | A692T     |
| 14722_8#58_H37Rv | LAM                | C                 | G            | cgg             | 2              | cGg             | P1040R    | C                 | T            | teg             | 2              | tTg             | S450L     |
| 14722_8#59_H37Rv | LAM                | G                 | A            | gtg             | 1              | Aig             | V1252M    | C                 | T            | teg             | 2              | tTg             | S450L     |
| 14722_8#6_H37Rv  | LAM                | T                 | A            | gtg             | 2              | gAg             | V1124E    | C                 | T            | teg             | 2              | tTg             | S450L     |
| 14722_8#66_H37Rv | LAM                | A                 | C            | gag             | 2              | gCg             | E49A      | A                 | T            | gac             | 2              | gTc             | D435V     |
| 14722_8#69_H37Rv | LAM                | A                 | G            | aac             | 2              | aGc             | N698S     | C                 | T            | teg             | 2              | tTg             | S450L     |
| 14722_8#70_H37Rv | LAM                | G                 | C            | gtg             | 1              | Ctg             | V1252L    | C                 | T            | teg             | 2              | tTg             | S450L     |
| 14722_8#75_H37Rv | LAM                | G                 | A            | gtg             | 1              | Aig             | V1252M    | G                 | A            | gcc             | 1              | Acc             | A692T     |
| 14722_8#76_H37Rv | Haarlem            | G                 | A            | ggg             | 2              | gAg             | G594E     | C                 | T            | teg             | 2              | tTg             | S450L     |
|                  |                    |                   |              |                 |                |                 |           | A                 | T            | gac             | 2              | gTc             | D435V     |

Contd...

**Supplementary Table 2: Contd...**

| Strain Number    | Spoligotyping      | Mutations in rpoC |              |                 |                |                 |           | Mutations in rpoB |              |                 |                |                 |           |
|------------------|--------------------|-------------------|--------------|-----------------|----------------|-----------------|-----------|-------------------|--------------|-----------------|----------------|-----------------|-----------|
|                  |                    | Original base     | Mutated base | Reference codon | Codon position | Mutations codon | aa change | Original base     | Mutated base | Reference codon | Codon position | Mutations codon | aa change |
| 14722_8#77_H37Rv | LAM                | C                 | T            | acc             | 2              | aTc             | T812I     | C                 | T            | teg             | 2              | tTg             | S450L     |
| 14722_8#79_H37Rv | Haarlem            | G                 | A            | ggg             | 2              | gAg             | G594E     | G                 | A            | gcc             | 1              | Acc             | A692T     |
| 14722_8#8_H37Rv  | LAM                | A                 | G            | aac             | 2              | aGc             | N698S     | C                 | T            | gac             | 2              | gTc             | D435V     |
| 14722_8#80_H37Rv | LAM                | C                 | G            | cgg             | 1              | Gcg             | P1040A    | C                 | T            | teg             | 2              | tTg             | S450L     |
| 14722_8#81_H37Rv | T                  | C                 | G            | cgg             | 1              | Gcg             | P1040A    | C                 | T            | teg             | 2              | tTg             | S450L     |
| 14722_8#86_H37Rv | Other small clades | G                 | A            | ggg             | 2              | gAg             | G594E     | G                 | C            | gtg             | 1              | Ctg             | V695L     |
| 14722_8#87_H37Rv | Other small clades | T                 | G            | gtg             | 2              | gGg             | V483G     |                   |              |                 |                |                 |           |
| 14722_8#88_H37Rv | LAM                | C                 | A            | cgc             | 1              | Agc             | R741S     | C                 | T            | teg             | 2              | tTg             | S450L     |
| 14722_8#89_H37Rv | Other small clades | G                 | A            | ggg             | 2              | gAg             | G594E     | C                 | T            | teg             | 2              | tTg             | S450F     |
| 14722_8#90_H37Rv | LAM                | C                 | T            | acc             | 2              | aTc             | T812I     | C                 | T            | teg             | 2              | tTg             | S450L     |
| 14722_8#93_H37Rv | Haarlem            | A                 | C            | gaa             | 2              | gCa             | E757A     | G                 | A            | gcc             | 1              | Acc             | A692T     |
| 14722_8#95_H37Rv | Other small clades | C                 | T            | ggc             | 2              | gTc             | A734V     | C                 | T            | teg             | 2              | tTg             | S450L     |
| 14892_2#1_H37Rv  | LAM                | G                 | C            | gtg             | 1              | Ctg             | V517L     | C                 | T            | teg             | 2              | tTg             | S450L     |
| 14892_2#27_H37Rv | Haarlem            | G                 | A            | ggg             | 2              | gAg             | G594E     | T,C               | A,T          | teg             | 1,2            | ATG             | S450M     |
| 14892_2#29_H37Rv | LAM                | A                 | G            | aac             | 2              | aGc             | N698S     | C                 | T            | teg             | 2              | tTg             | S450L     |
| 14892_2#35_H37Rv | LAM                | T                 | C            | gtg             | 2              | gCg             | V483A     | A                 | C            | caa             | 2              | cCa             | Q432P     |
| 14892_2#39_H37Rv | LAM                | C                 | A            | cgc             | 1              | Agc             | R741S     | C                 | G            | cac             | 1              | Gac             | H445D     |
| 14892_2#41_H37Rv | Haarlem            | G                 | C            | ggc             | 2              | gCc             | G388A     | C                 | T            | teg             | 2              | tTg             | S450L     |
| 14892_2#43_H37Rv | LAM                | G                 | A            | ggg             | 2              | gAg             | G594E     | A                 | T            | gac             | 2              | gTc             | D435V     |
| 14892_2#45_H37Rv | LAM                | C                 | A            | cgc             | 1              | Agc             | R741S     | C                 | G            | cac             | 1              | Gac             | H445D     |
| 14892_2#58_H37Rv | LAM                | G                 | C            | ggc             | 2              | gCc             | G388A     | C                 | T            | teg             | 2              | tTg             | S450L     |
| 14892_2#58_H37Rv | LAM                | A                 | G            | atc             | 1              | Gtc             | I997V     | C                 | T            | teg             | 2              | tTg             | S450L     |
| 14892_2#58_H37Rv | LAM                | A                 | G            | atc             | 1              | Gtc             | I851V     | C                 | T            | teg             | 2              | tTg             | S450L     |
| 14892_2#58_H37Rv | LAM                | A                 | G            | atc             | 1              | Gtc             | I491V     | G                 | A            | gcc             | 1              | Acc             | A692T     |

Contd...

**Supplementary Table 2: Contd...**

| Strain Number     | Spoligotyping      | Mutations in rpoC |              |                 |                |                 |           | Mutations in rpoB |              |                 |                |                 |           |
|-------------------|--------------------|-------------------|--------------|-----------------|----------------|-----------------|-----------|-------------------|--------------|-----------------|----------------|-----------------|-----------|
|                   |                    | Original base     | Mutated base | Reference codon | Codon position | Mutations codon | aa change | Original base     | Mutated base | Reference codon | Codon position | Mutations codon | aa change |
| 14892_2#59_H37Rv  | T                  | T                 | G            | gtg             | 2              | gGg             | V483G     | C                 | T            | teg             | 2              | tTg             | S450L     |
| 14892_2#63_H37Rv  | Beijing            | G                 | C            | igg             | 2              | tCg             | W484S     | G                 | C            | gtg             | 1              | Ctg             | V695L     |
| 14892_2#65_H37Rv  | Other small clades | G                 | A            | ggg             | 2              | gAg             | G594E     | C                 | T            | teg             | 2              | tTg             | S450L     |
| 14892_2#66_H37Rv  | LAM                | C                 | G            | ccg             | 1              | Gcg             | P1040A    | C                 | T            | teg             | 2              | tTg             | S450L     |
| 14892_2#67_H37Rv  | LAM                | G                 | T            | gtg             | 1              | Ttg             | V517L     | C                 | T            | teg             | 2              | tTg             | S450L     |
| 14892_2#69_H37Rv  | LAM                | C                 | T            | ccg             | 2              | cTg             | P615L     | C                 | T            | teg             | 2              | tTg             | S450L     |
| 14892_2#70_H37Rv  | LAM                | G                 | T            | gtg             | 1              | Ttg             | V517L     | C                 | T            | teg             | 2              | tTg             | S450L     |
| 14892_2#71_H37Rv  | LAM                | G                 | A            | gtg             | 1              | Aig             | V1252M    | C                 | T            | teg             | 2              | tTg             | S450L     |
| 14892_2#74_H37Rv  | Haarlem            | G                 | A            | ggg             | 2              | gAg             | G594E     | C                 | T            | ccg             | 1              | Tcg             | P45S      |
| 14892_2#76_H37Rv  | LAM                | G                 | A            | gag             | 1              | Aag             | E1033K    | C                 | T            | teg             | 2              | tTg             | S450L     |
| 14892_2#80_H37Rv  | LAM                | G                 | A            | gtg             | 1              | Aig             | V1252M    | C                 | T            | ttc             | 3              | ttG             | F424L     |
| 14892_2#82_H37Rv  | Haarlem            | G                 | A            | ggg             | 2              | gAg             | G594E     | A                 | T            | atc             | 1              | Ttc             | I491F     |
| 14892_2#85_H37Rv  | Haarlem            | G                 | A            | ggg             | 2              | gAg             | G594E     | C                 | T            | teg             | 2              | tTg             | S450L     |
| 14892_2#88_H37Rv  | Haarlem            | T                 | C            | ctg             | 2              | cCg             | L516P     | C                 | T            | teg             | 2              | tTg             | S450L     |
| 14892_2#89_H37Rv  | Other small clades | T                 | G            | gtg             | 2              | gGg             | V483G     | C                 | T            | teg             | 2              | tTg             | S450L     |
| 14892_2#90_H37Rv  | Other small clades | G                 | A            | ggg             | 2              | gAg             | G594E     | G                 | C            | gtg             | 1              | Ctg             | V695L     |
| 14892_2#91_H37Rv  | Other small clades | T                 | A            | tcg             | 1              | Acg             | S428T     | G                 | T            | gtc             | 1              | Ttc             | V170F     |
| 14892_2#93_H37Rv  | LAM                | C                 | A            | cgc             | 1              | Agc             | R741S     | A                 | C            | atc             | 1              | Ctc             | I488L     |
| 14892_2#94_H37Rv  | Haarlem            | C                 | T            | gcc             | 2              | gTc             | A734V     | C                 | T            | teg             | 2              | tTg             | S450F     |
| 14892_2#95_H37Rv  | Haarlem            | G                 | A            | ggg             | 2              | gAg             | G594E     | C                 | T            | teg             | 2              | tTg             | S450L     |
| 14892_2#96_H37Rv  | LAM                | T                 | G            | gtg             | 2              | gGg             | V483G     | C                 | T            | teg             | 2              | tTg             | S450L     |
| 14892_2#97_H37Rv  | Haarlem            | C                 | T            | gcc             | 2              | gTc             | A734V     | C                 | T            | teg             | 2              | tTg             | S450L     |
| 14892_2#98_H37Rv  | Haarlem            | G                 | A            | ggg             | 2              | gAg             | G594E     | C                 | T            | teg             | 2              | tTg             | S450L     |
| 14892_2#99_H37Rv  | Haarlem            | G                 | A            | ggg             | 2              | gAg             | G594E     | C                 | T            | teg             | 2              | tTg             | S450L     |
| 14892_2#100_H37Rv | Other small clades | G                 | A            | ggg             | 2              | gAg             | G594E     | A                 | T            | atc             | 1              | Ttc             | I491F     |
| 14893_2#23_H37Rv  | LAM                | C                 | G            | ccg             | 1              | Ccg             | P1040A    | C                 | T            | teg             | 2              | tTg             | S450L     |
| 14893_2#30_H37Rv  | Other small clades | G                 | A            | ggg             | 2              | gAg             | G594E     | G                 | T            | gtc             | 1              | Ttc             | V170F     |
| 14893_2#31_H37Rv  | Other small clades | G                 | A            | ggg             | 1              | Agg             | G571R     | G                 | T            | gtc             | 1              | Ttc             | V170F     |

Contd...

**Supplementary Table 2: Contd...**

| Strain Number    | Spoligotyping      | Mutations in rpoC |              |                 |                |                 |           | Mutations in rpoB |              |                 |                |                 |           |
|------------------|--------------------|-------------------|--------------|-----------------|----------------|-----------------|-----------|-------------------|--------------|-----------------|----------------|-----------------|-----------|
|                  |                    | Original base     | Mutated base | Reference codon | Codon position | Mutations codon | aa change | Original base     | Mutated base | Reference codon | Codon position | Mutations codon | aa change |
| 14893_2#36_H37Rv | LAM                | C                 | T            | acc             | 2              | aTc             | T812I     | C                 | T            | tcg             | 2              | tTg             | S450L     |
| 14893_2#37_H37Rv | LAM                | A                 | G            | aac             | 2              | aGc             | N688S     | G                 | A            | gcc             | 1              | Acc             | A692T     |
| 14893_2#38_H37Rv | LAM                | C                 | A            | cgc             | 1              | Agc             | R741S     | C                 | T            | tcg             | 2              | tTg             | S450L     |
| 14893_2#40_H37Rv | LAM                | G                 | T            | gtg             | 1              | Ttg             | V517L     | C                 | T            | tcg             | 2              | tTg             | S450L     |
| 14893_2#43_H37Rv | Haarlem            | G                 | A            | ggg             | 2              | gAg             | G594E     | C                 | T            | tcg             | 2              | tTg             | S450L     |
| 14893_2#45_H37Rv | LAM                | C                 | G            | cgg             | 1              | Gcg             | P1040A    | C                 | T            | tcg             | 2              | tTg             | R827C     |
| 14893_2#46_H37Rv | LAM                | A                 | G            | atc             | 1              | Gtc             | I491V     | C                 | T            | tcg             | 2              | tTg             | S450L     |
| 14893_2#47_H37Rv | Haarlem            | G                 | A            | ggg             | 2              | gAg             | G594E     | G                 | A            | gcc             | 1              | Acc             | A692T     |
| 14893_2#49_H37Rv | Haarlem            | G                 | A            | ggg             | 2              | gAg             | G594E     | C                 | T            | tcg             | 2              | tTg             | S450L     |
| 14893_2#52_H37Rv | T                  | T                 | G            | gtg             | 2              | gGg             | V483G     | C                 | T            | tcg             | 2              | tTg             | G973D     |
| 14893_2#54_H37Rv | Beijing            | C                 | T            | ggg             | 2              | gTg             | A788V     | G,A               | T,T          | gac             | 1,2            | TTC             | H445D     |
| 14893_2#6_H37Rv  | Haarlem            | G                 | T            | gtg             | 1              | Ttg             | V1252L    | C                 | T            | tcg             | 2              | tTg             | S450L     |
| 14893_2#63_H37Rv | Haarlem            | G                 | A            | ggg             | 2              | gAg             | G594E     | G                 | A            | ggc             | 2              | gAc             | V695L     |
| 14893_2#64_H37Rv | Haarlem            | G                 | A            | ggg             | 2              | gAg             | G594E     | C                 | G            | cac             | 1              | Gac             | D435F     |
| 14893_2#71_H37Rv | Haarlem            | G                 | A            | ggg             | 2              | gAg             | G594E     | C                 | T            | tcg             | 2              | tTg             | S450L     |
| 14893_2#72_H37Rv | T                  | T                 | G            | gtg             | 2              | gGg             | V483G     | G                 | C            | gtg             | 1              | Ctg             | S450L     |
| 14893_2#74_H37Rv | Haarlem            | G                 | A            | ggg             | 2              | gAg             | G594E     | G                 | C            | gtg             | 1              | Ctg             | V695L     |
| 14893_2#75_H37Rv | Haarlem            | T                 | G            | gtg             | 2              | gGg             | V1206G    | C                 | G            | tcg             | 2              | tGg             | S450W     |
| 14893_2#79_H37Rv | Haarlem            | G                 | A            | ggg             | 2              | gAg             | D1218A    | A                 | T            | gac             | 2              | gTc             | D435V     |
| 14893_2#80_H37Rv | LAM                | G                 | A            | gtg             | 1              | Atg             | V1252M    | A                 | G            | gag             | 2              | gGg             | E250G     |
| 14893_2#84_H37Rv | LAM                | G                 | T            | gtg             | 1              | Ttg             | V517L     | A                 | G            | gag             | 2              | gGg             | S450L     |
| 14893_2#86_H37Rv | LAM                | C                 | G            | cgg             | 1              | Gcg             | P1040A    | C                 | T            | tcg             | 2              | tTg             | S450L     |
| 14893_2#87_H37Rv | LAM                | G                 | C            | ggc             | 1              | Cgc             | G332R     | C                 | T            | tcg             | 2              | tTg             | S450L     |
| 14893_2#86_H37Rv | Haarlem            | G                 | A            | ggg             | 2              | gAg             | G594E     | A                 | T            | gac             | 2              | gTc             | D435V     |
| 14893_2#87_H37Rv | Beijing            | G                 | C            | ttg             | 2              | tCg             | W484S     | C                 | T            | tcg             | 2              | tTg             | S450L     |
| 14893_2#87_H37Rv | Other small clades | G                 | A            | ggg             | 2              | gAg             | G594E     | C                 | T            | tcg             | 2              | tTg             | S450L     |
| 14893_2#87_H37Rv | Other small clades | T                 | C            | gtg             | 2              | gCg             | V483A     | C                 | G            | tcg             | 2              | tGg             | S450W     |

Contd...



| Strain Number    | Spoligotyping      | Mutations in rpoC |              |                 |                |                 |           | Mutations in rpoB |              |                 |                |                 |           |
|------------------|--------------------|-------------------|--------------|-----------------|----------------|-----------------|-----------|-------------------|--------------|-----------------|----------------|-----------------|-----------|
|                  |                    | Original base     | Mutated base | Reference codon | Codon position | Mutations codon | aa change | Original base     | Mutated base | Reference codon | Codon position | Mutations codon | aa change |
| 14893_2#89_H37Rv | Beijing            | G                 | C            | tgg             | 2              | tCg             | W484S     | C                 | T            | tcg             | 2              | tTg             | S450L     |
| 14893_2#9_H37Rv  | T                  | T                 | G            | tTg             | 1              | GtG             | L507V     | C                 | T            | tcg             | 2              | tTg             | S450L     |
| 14893_2#90_H37Rv | Beijing            | T                 | C            | gtg             | 2              | gCg             | V483A     | C                 | T            | tcg             | 2              | tTg             | S450L     |
| 14893_2#92_H37Rv | Other small clades | G                 | A            | ggg             | 2              | gAg             | G594E     | C                 | G            | agc             | 3              | agG             | S428R     |
| 14893_2#93_H37Rv | Other small clades | G                 | A            | ggg             | 2              | gAg             | G594E     | C                 | T            | tcg             | 2              | tTg             | S450L     |
|                  | Other small clades | T                 | C            | gtg             | 2              | gCg             | V483A     |                   |              |                 |                |                 |           |
| 14893_2#94_H37Rv | Haarlem            | G                 | A            | ggg             | 2              | gAg             | G594E     | C                 | T            | tcg             | 2              | tTg             | S450L     |
| 14893_2#95_H37Rv | Haarlem            | G                 | A            | ggg             | 1              | Agg             | G571R     |                   |              |                 |                |                 |           |
| 14893_2#85_H37Rv | LAM                | T                 | G            | gtg             | 2              | gGg             | V483G     | C                 | T            | tcg             | 2              | tTg             | S450L     |
| 14893_2#85_H37Rv | Other small clades | G                 | A            | ggg             | 2              | gAg             | G594E     | C                 | T            | tcg             | 2              | tTg             | S450L     |
| 14893_2#88_H37Rv | T                  | T                 | G            | gtg             | 2              | gGg             | V483G     | C                 | T            | tcg             | 2              | tTg             | S450L     |
|                  |                    |                   |              |                 |                |                 |           | G                 | C            | gtg             | 1              | CtG             | V695L     |

| Supplementary Table 3: Putative rpoC compensatory mutations |           |                                                     |          |
|-------------------------------------------------------------|-----------|-----------------------------------------------------|----------|
| Mutation                                                    | aa change | Spoligotyping                                       | Reported |
| aac - aaA                                                   | N698K     | LAM (2)                                             | Yes      |
| atc - Gtc                                                   | I491V     | Haarlem (1), LAM (6), other small clades (1)        | Yes      |
| cac - caG                                                   | H525Q     | Beijing                                             | Yes      |
| cag - cGg                                                   | P1040R    | Beijing, LAM (2)                                    | Yes      |
| ctg - cCg                                                   | L516P     | Haarlem (2)                                         | Yes      |
| gtg - Atg                                                   | V1252M    | LAM (8)                                             | Yes      |
| gtg - gCg                                                   | V483A     | Beijing (1), LAM (2), T (1), other small clades (2) | Yes      |
| gtg - gGg                                                   | V483G     | T (5), other small clades (2), LAM (4)              | Yes      |
| gtg - Ttg                                                   | V1252L    | T, LAM, Haarlem                                     | Yes      |
| gtg - Ttg                                                   | V517L     | LAM (10), NA (1)                                    | No       |
| tcg - Acg                                                   | S428T     | LAM (11), NA (1), other small clades (1)            | No       |
| tgg - tCg                                                   | W484S     | Beijing (6)                                         | No       |
| ttc - Ctc                                                   | F831L     | Other small clades (1)                              | No       |
| ttg - Gtg                                                   | L507V     | T (1)                                               | No       |
|                                                             | L527V     | T (1), other small clades (1)                       | No       |
| aac - aGc                                                   | N698S     | LAM (6)                                             | No       |
| acc - aTc                                                   | T812I     | LAM (7)                                             | No       |
| atc - Gtc                                                   | I851V     | LAM (1)                                             | No       |
|                                                             | I997V     | LAM (1)                                             | No       |
|                                                             | I885V     | LAM (1)                                             | No       |
| cag - Gag                                                   | Q523E     | Beijing (1)                                         | No       |
| ccg - cAg                                                   | P1040Q    | T (1)                                               | No       |
| ccg - cTg                                                   | P1040L    | LAM (1)                                             | No       |
|                                                             | P615L     | LAM (1)                                             | No       |
| ccg - Gcg                                                   | P1040A    | LAM (14), T (1)                                     | No       |
| cgc - Agc                                                   | R741S     | LAM (8), NA (1), T (1)                              | No       |
| ctc - cGc                                                   | L1245R    | Beijing (1)                                         | No       |
| ctg - cAg                                                   | L516Q     | LAM (1)                                             | No       |
| gaa - gCa                                                   | E757A     | LAM (1)                                             | No       |
| gaa - gGa                                                   | E488G     | Haarlem (1)                                         | No       |
| gag - Aag                                                   | E1033K    | LAM (1)                                             | No       |
| gag - gCg                                                   | E49A      | LAM (1)                                             | No       |
| gag - gGg                                                   | E744G     | Other small clades (1)                              | No       |
| gcc - Ccc                                                   | A1047P    | LAM (1)                                             | No       |
| gcc - gTc                                                   | A734V     | Haarlem (4)                                         | No       |
| gcg - gTg                                                   | A788V     | Beijing (1)                                         | No       |
| ggc - Cgc                                                   | G332R     | T (3), LAM (1)                                      | No       |
| ggc - gCc                                                   | G388A     | LAM (2)                                             | No       |
| ggc - gTc                                                   | G945V     | LAM (1)                                             | No       |
| ggg - Agg                                                   | G571R     | Haarlem (3), other small clades (1)                 | No       |
| ggg - gGg                                                   | V1206G    | Haarlem (1)                                         | No       |
| gtg - gAg                                                   | V1124E    | LAM (1)                                             | No       |
| gtg - gCg                                                   | V1147A    | Other small clades (1)                              | No       |
| gtg - gGg                                                   | D1218A    | Haarlem (1)                                         | No       |

Numbers in brackets indicate the number of isolates in each strain
